# Supplementary material
Source: ML conference proceedings conference paper supplement (https://aclanthology.org/2026.semeval-1.170)

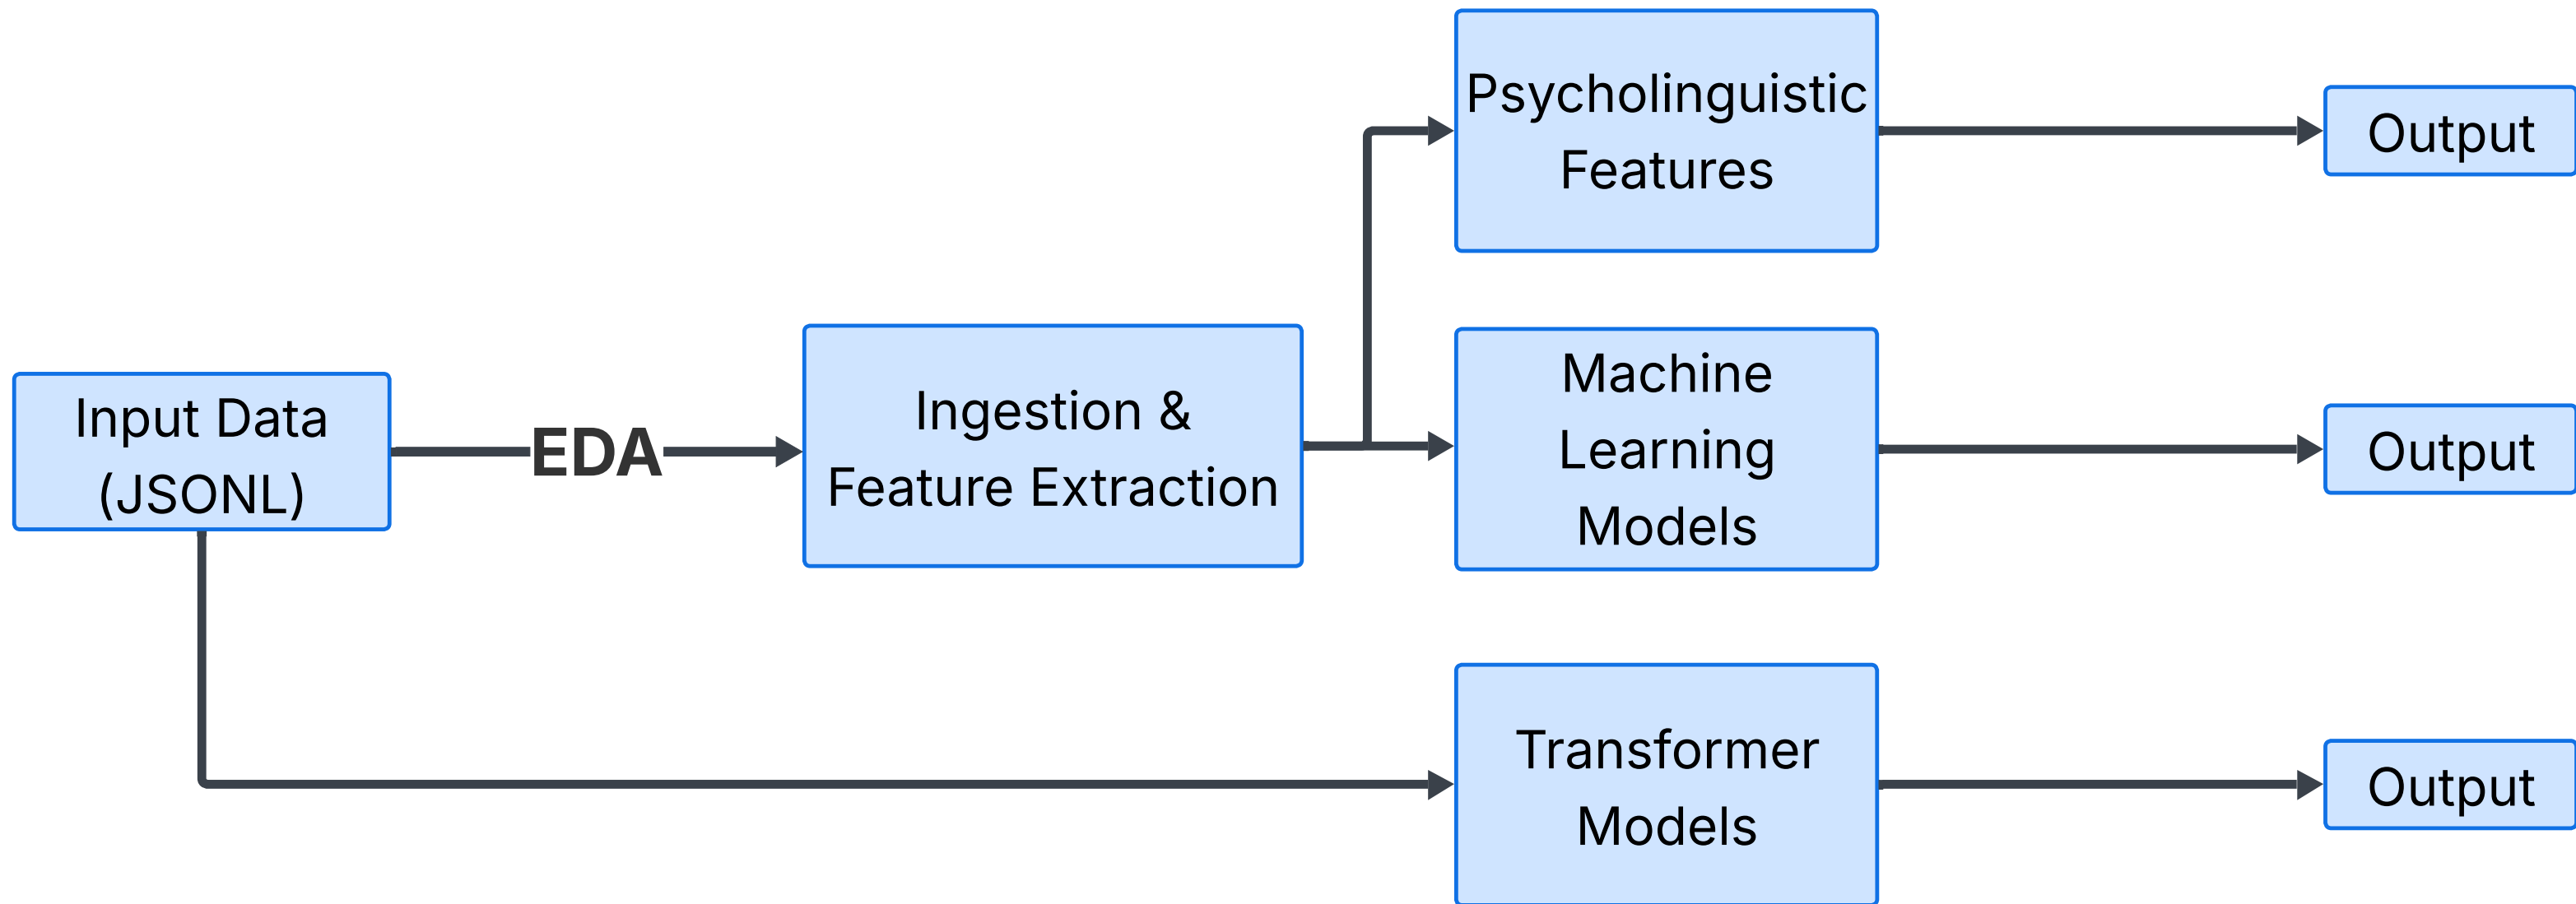

Supplement: SupplementaryMaterial [file Architecture.pdf › visuals/Architecture.pdf]
